# Supplementary material
Source: publisher figshare collection journal article supplement (https://gsapubs.figshare.com/ndownloader/files/22745852)

DR2004140

## Appendix DR1

### Geological setting and accompanying fossil association

The material described herein was collected from the lower Meishucunian (equivalent to the Nemakit-Daldynian of Siberia) Shizhonggou section (Conway Morris and Chen, 1992) near Kuanchuanpu, Ningqiang County, Shaanxi Province (China). The section consists of 55 m of phosphatic carbonates, siltstones, and cherts. Phosphatized eggs and embryos occur within a 15 m interval of the upper *Anabarites trisulcatus*-*Protohertzina anabarica* Zone of the Kuanchuanpu Formation, providing the oldest fossil association of the earliest Cambrian bioradiation on the Yangtze Platform. The fossils were extracted from carbonate rocks using weak acetic acid. A particularly rich layer in the middle Kuanchuanpu Formation, containing 1.0 g eggs and embryos per kg rock, was exploited for biostatistical investigations. Biostratigraphic correlation with well-dated sequences (Grotzinger et al., 1995) yielded an absolute age of approximately 535 Myr for the embryo-containing strata. Apart from fossil embryos, the same beds also contain numerous disarticulated and phosphatized small shelly fossils (SSF). The interpretation and assignment of the earliest SSFs and phosphatized unsclerotized remains (cuticles, algae, bacteria, eggs) is still controversial, mainly due to their fragmentary preservation. *Anabarites trisulcatus*, *Conotheca subcurvata*, as well as different form-taxa of the *Siphogonuchites*/*Lopochites*/*Maikhanella*-group are the dominant species. *Protohertzina anabarica*, *P. unguliformis*, *Carinachites spinatus* and *Punctatus emeiensis* occur subdominantly. *Anabarites* has been interpreted as a cnidarian by various authors (Bengtson et al., 1990), although this affiliation remains uncertain. The bilateral-symmetrical siphogonuchitids were assigned to the Coeloscleritophora and are closely related to halkieriids and wiwaxiids (Bengtson et al., 1990). Wiwaxiids have been

considered as stem-group representatives of the annelids while brachiopods are thought to be derived from the halkieriids (Conway Morris and Peel, 1995) although a more direct stem-group relationship of halkieriids and wiwaxiids to molluscs has also been advocated (Runnegar, 1996). Species of *Protohertzina* represent protoconodonts, which have been compared with chaetognaths (McIlroy and Szaniawski, 2000; Szaniawski, 2002), and *Punctatus* has been interpreted as a scyphozoan cnidarian (Yue and Bengtson, 1999). It is worth to note that unequivocal arthropod fossils have not been reported from strata earlier than the late Meishucunian (equivalent to Tommotian) and a first major radiation of arthropods appeared world-wide in the Atdabanian (Brasier, 1989). However, arthropod ichnofossils have been recovered from the lower Meishucunian phosphorites containing SSF of first association on the Yangtze Platform, which indicate the existence of at least weakly sclerotized euarthropods (Weber and Zhu, 2003). Despite the uncertainties surrounding the affinities of the dispersed skeletal fossils, it is obvious that the eggs, embryos, and larvae are accompanied by a moderately diverse metazoan community having affinities to a variety of metazoan clades, including cnidarians, ecdysozoans, and lophotrochozoans.

## References

- Bengtson, S., Conway Morris, S., Cooper, B.J., Jell, P.A., and Runnegar, B., 1990, Early Cambrian fossils from South Australia: Brisbane, Association of Australasian Palaeontologists, 364 p.
- Brasier, M.D., 1989, Towards a biostratigraphy of the earliest skeletal biotas, *in* Cowie, J.W., and Brasier, M.D., eds., *The Precambrian - Cambrian Boundary*: Oxford, Clarendon Press, p. 117-165.
- Conway Morris, S., and Chen, M., 1992, Carinacitiids, Hexangulaconulariids, and *Punctatus*: Problematic metazoans from the Early Cambrian of South China: *Journal of Paleontology*, v. 66, p. 384-406.
- Conway Morris, S., and Peel, J.S., 1995, Articulated halkieriids from the Lower Cambrian of North Greenland and their role in early protostome evolution: *Phil. Trans R. Soc. Lond. (B)*, v. 347, p. 305-358.
- Grotzinger, J.P., Bowring, S.A., Saylor, B.Z., and Kaufman, A.J., 1995, Biostratigraphic and geochronologic constraints on early animal evolution: *Science*, v. 270, p. 598-604.
- McIlroy, D., and Szaniawski, H., 2000, A Lower Cambrian protoconodont apparatus from the Placentian of southeastern Newfoundland: *Lethaia*, v. 33, p. 95-102.

- Runnegar, B., 1996, Early evolution of the Mollusca: The fossil record., *in* Taylor, J., ed., Origin and evolutionary radiation of the Mollusca: Oxford, Oxford University Press, p. 77-87.
- Szaniawski, H., 2002, New evidence for the protoconodont origin of chaetognaths: *Acta Palaeontologica Polonica*, v. 47, p. 405-419.
- Weber, B., and Zhu, M., 2003, Arthropod trace fossils from the Zhujiqing Formation (Meishucunian, Yunnan) and their palaeobiological implications: *Progress in Natural Science*, v. 13(10), p. 795-800.
- Yue, Z., and Bengtson, S., 1999, Embryonic and post-embryonic development of the Early Cambrian cnidarian *Olivoooides*: *Lethaia*, v. 32, p. 181-195.

**Figure DR1.** Size histogram of cultured eggs of the modern arthropod *Triops cancriformis*; n=60 (material kindly provided by Dr. Erich Eder; Vienna).

**Figure DR2.** Size histogram of Early Cambrian egg stages with smooth egg membrane, previously all treated as *Olivoooides multisulcatus*; n=504; all extracted from a single thin (2 cm) sediment layer of the Kuanchuanpu Formation at Shizhonggou, Kuanchuanpu, Shaanxi Province, China.

**Figure DR3.** Size histogram of Early Cambrian blastulas with holoblastic cleavage, which may represent different biospecies, including the later discoidal-type embryos with germ band formation; n=348; all extracted from a single thin (2 cm) sediment layer of the Kuanchuanpu Formation at Shizhonggou, Kuanchuanpu, Shaanxi Province, China.

**Figure DR4.** Size histogram of Early Cambrian *Punctatus*-type embryos with stellate surface texture; n=208; all extracted from a single thin (2 cm) sediment layer of the Kuanchuanpu Formation at Shizhonggou, Kuanchuanpu, Shaanxi Province, China.

**Figure DR5.** Size histogram of Early Cambrian *Pseudoooides*-type embryos with germ band formation; n=206; all extracted from a single thin (2 cm) sediment layer of the Kuanchuanpu Formation at Shizhonggou, Kuanchuanpu, Shaanxi Province, China.

**Figure DR1. Size histogram of cultured eggs of the modern arthropod *Triops cancriformis*, n=60**

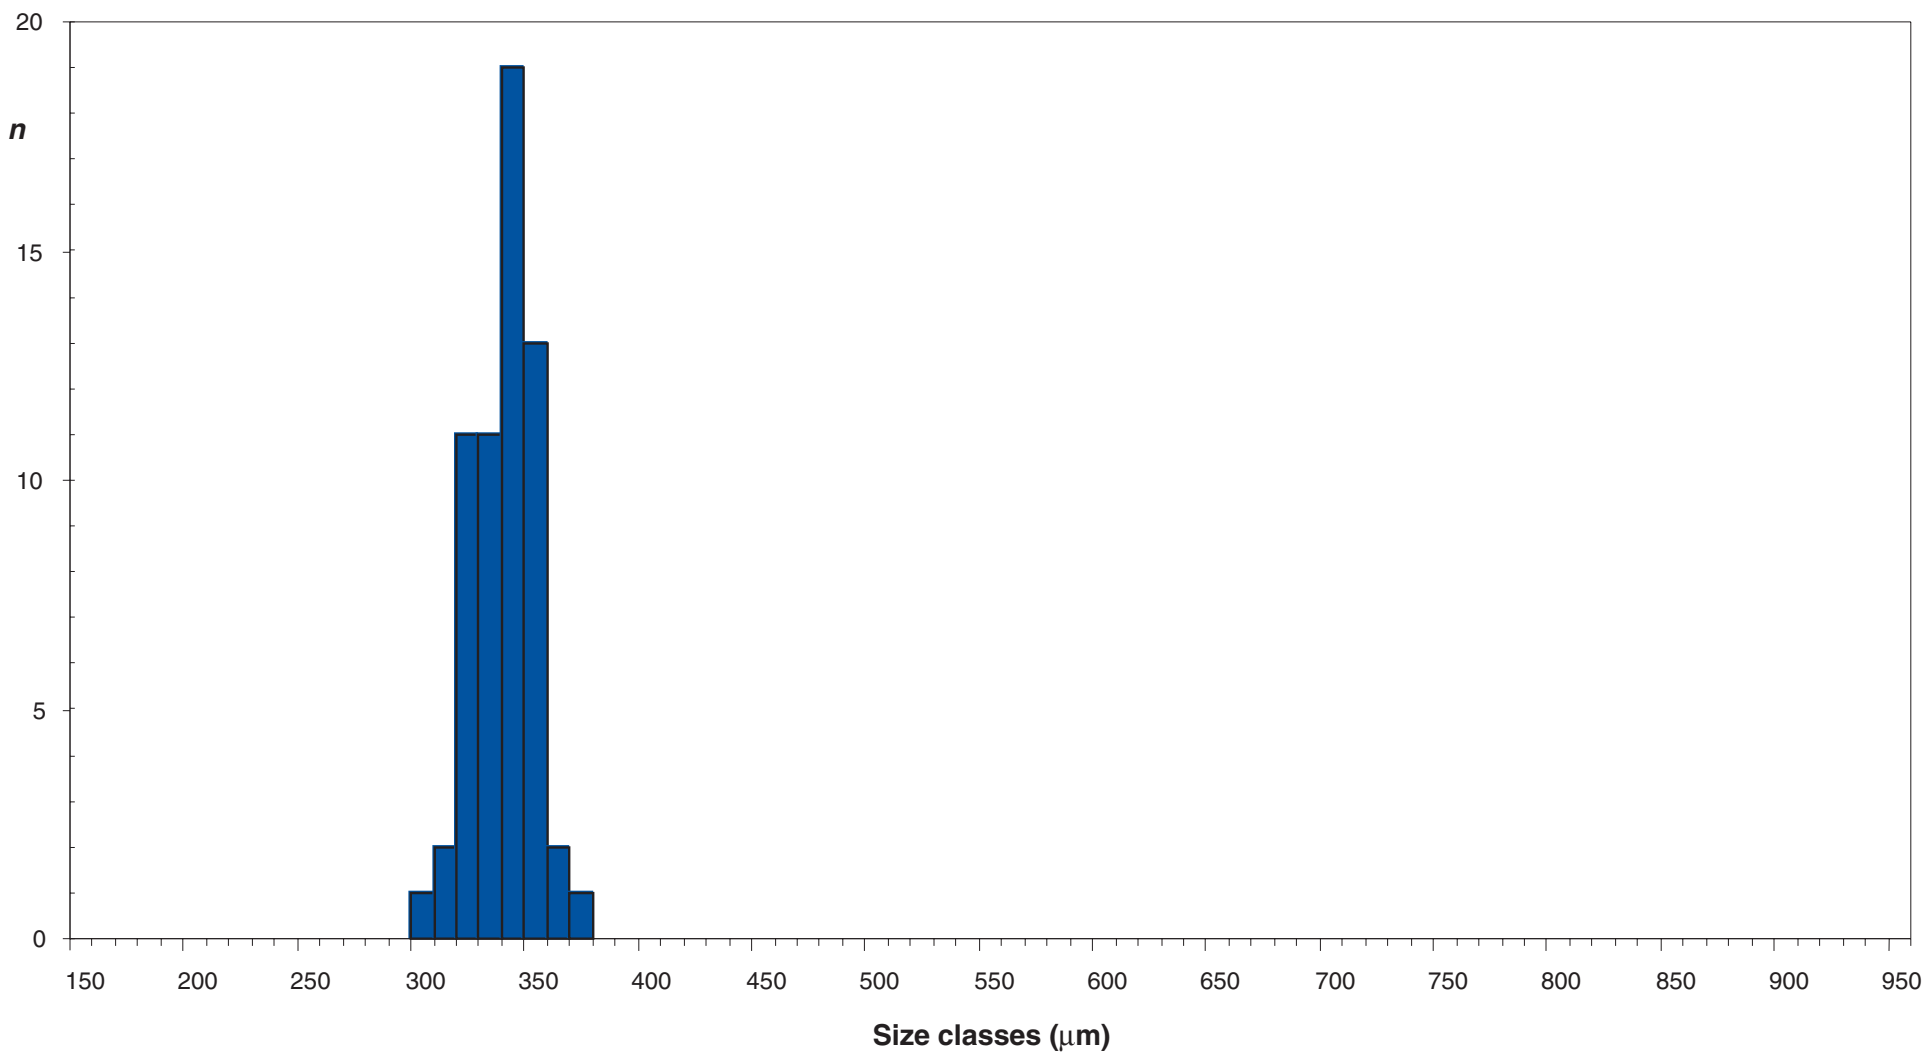

**Figure DR2. Size histogram of egg stages (previously all treated as *Olivoides multisulcatus*), n=504**

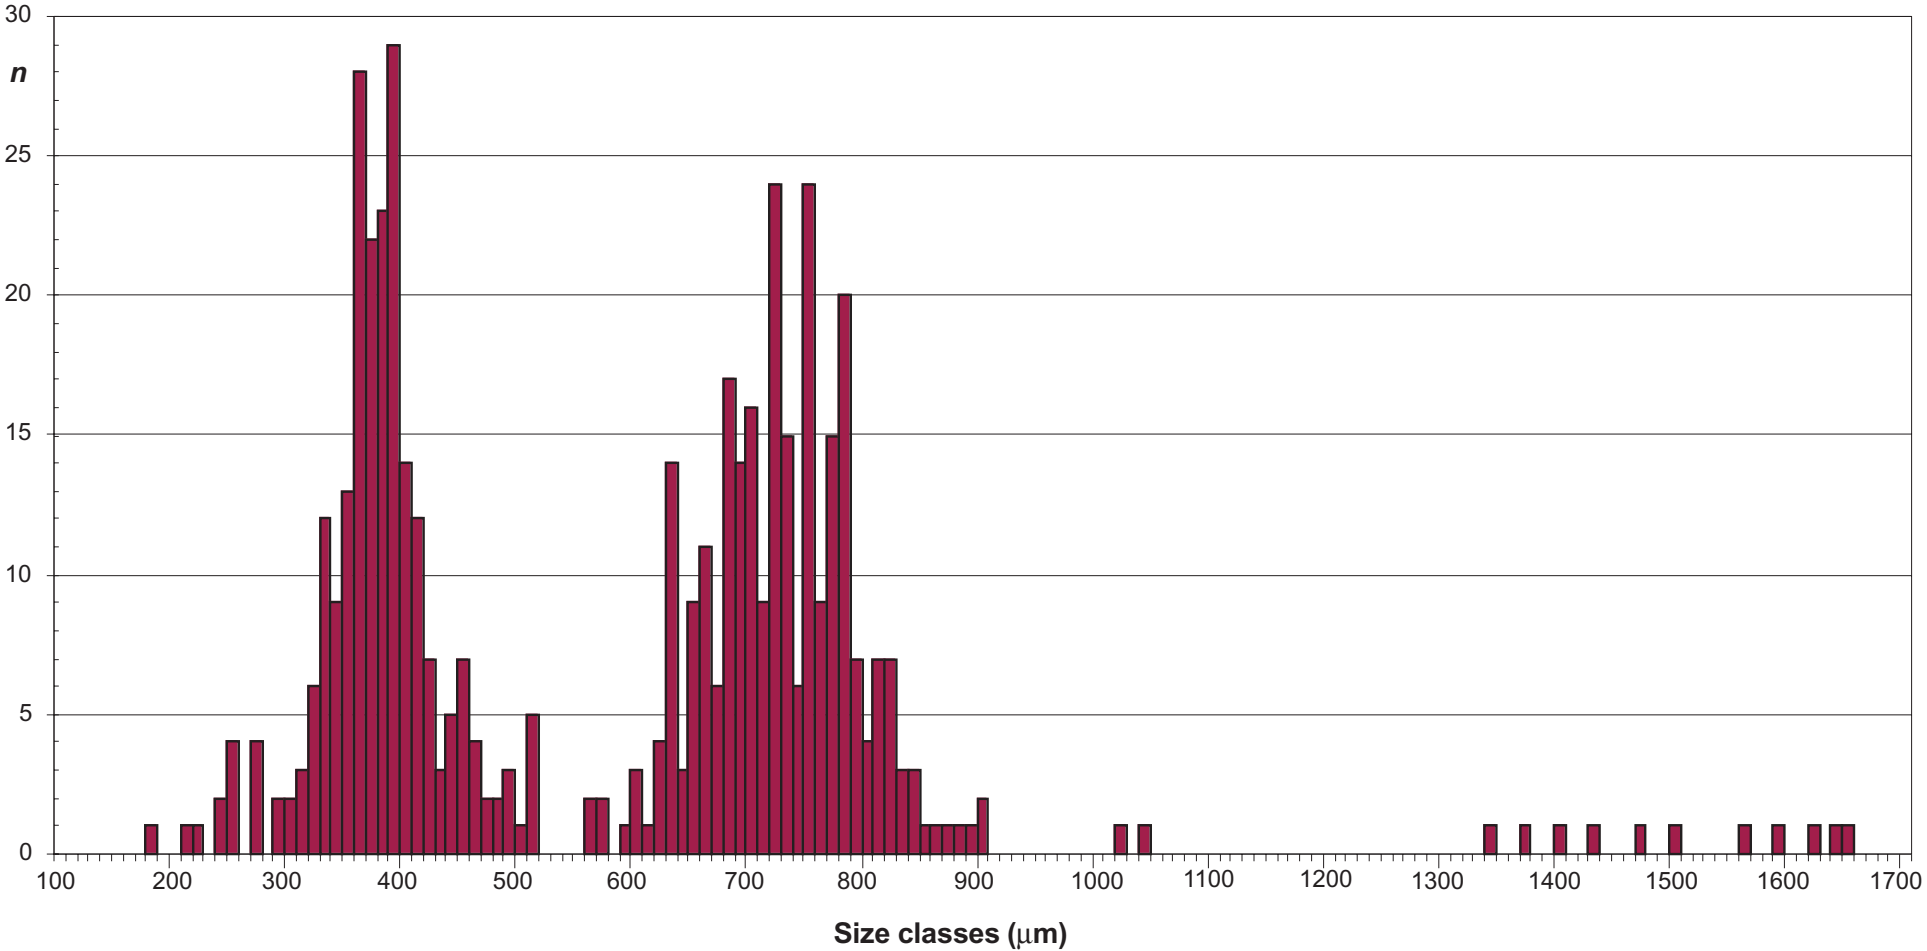

**Figure DR3. Size histogram of blastulas with holoblastic cleavage, n=348**

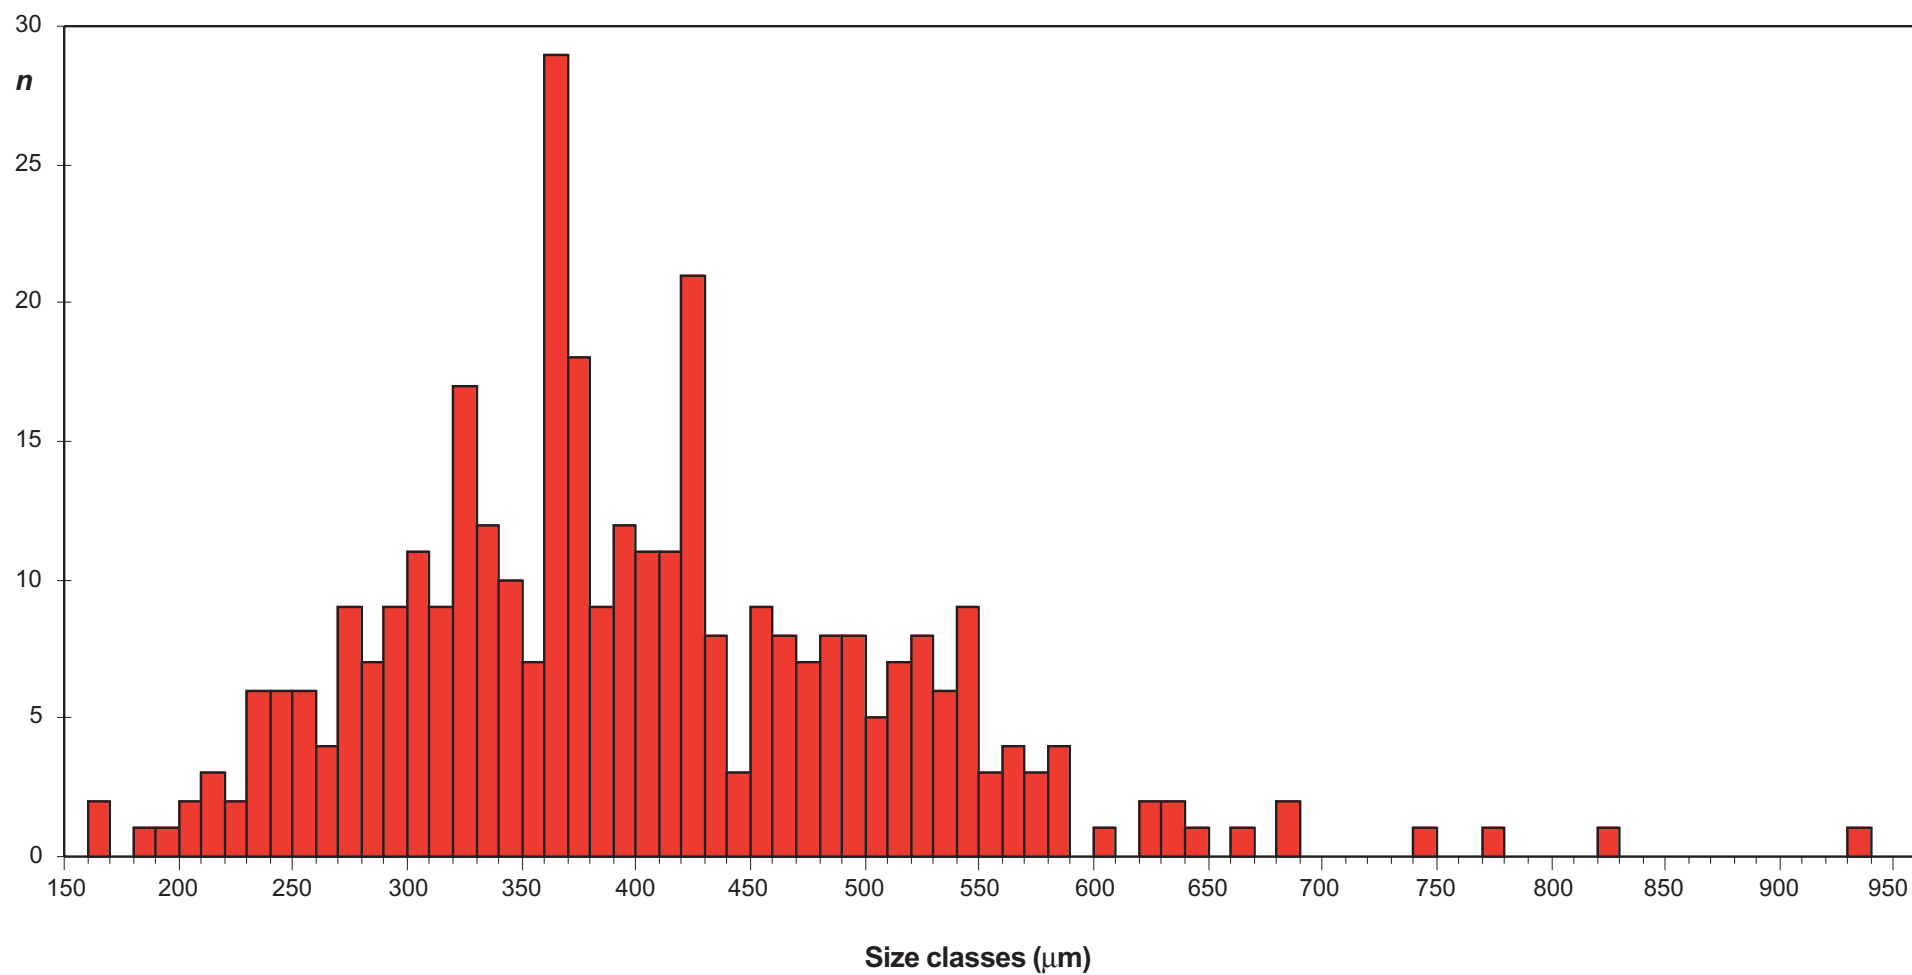

**Figure DR4. Size histogram of *Punctatus* -type embryos with stellate surface texture, n=208**

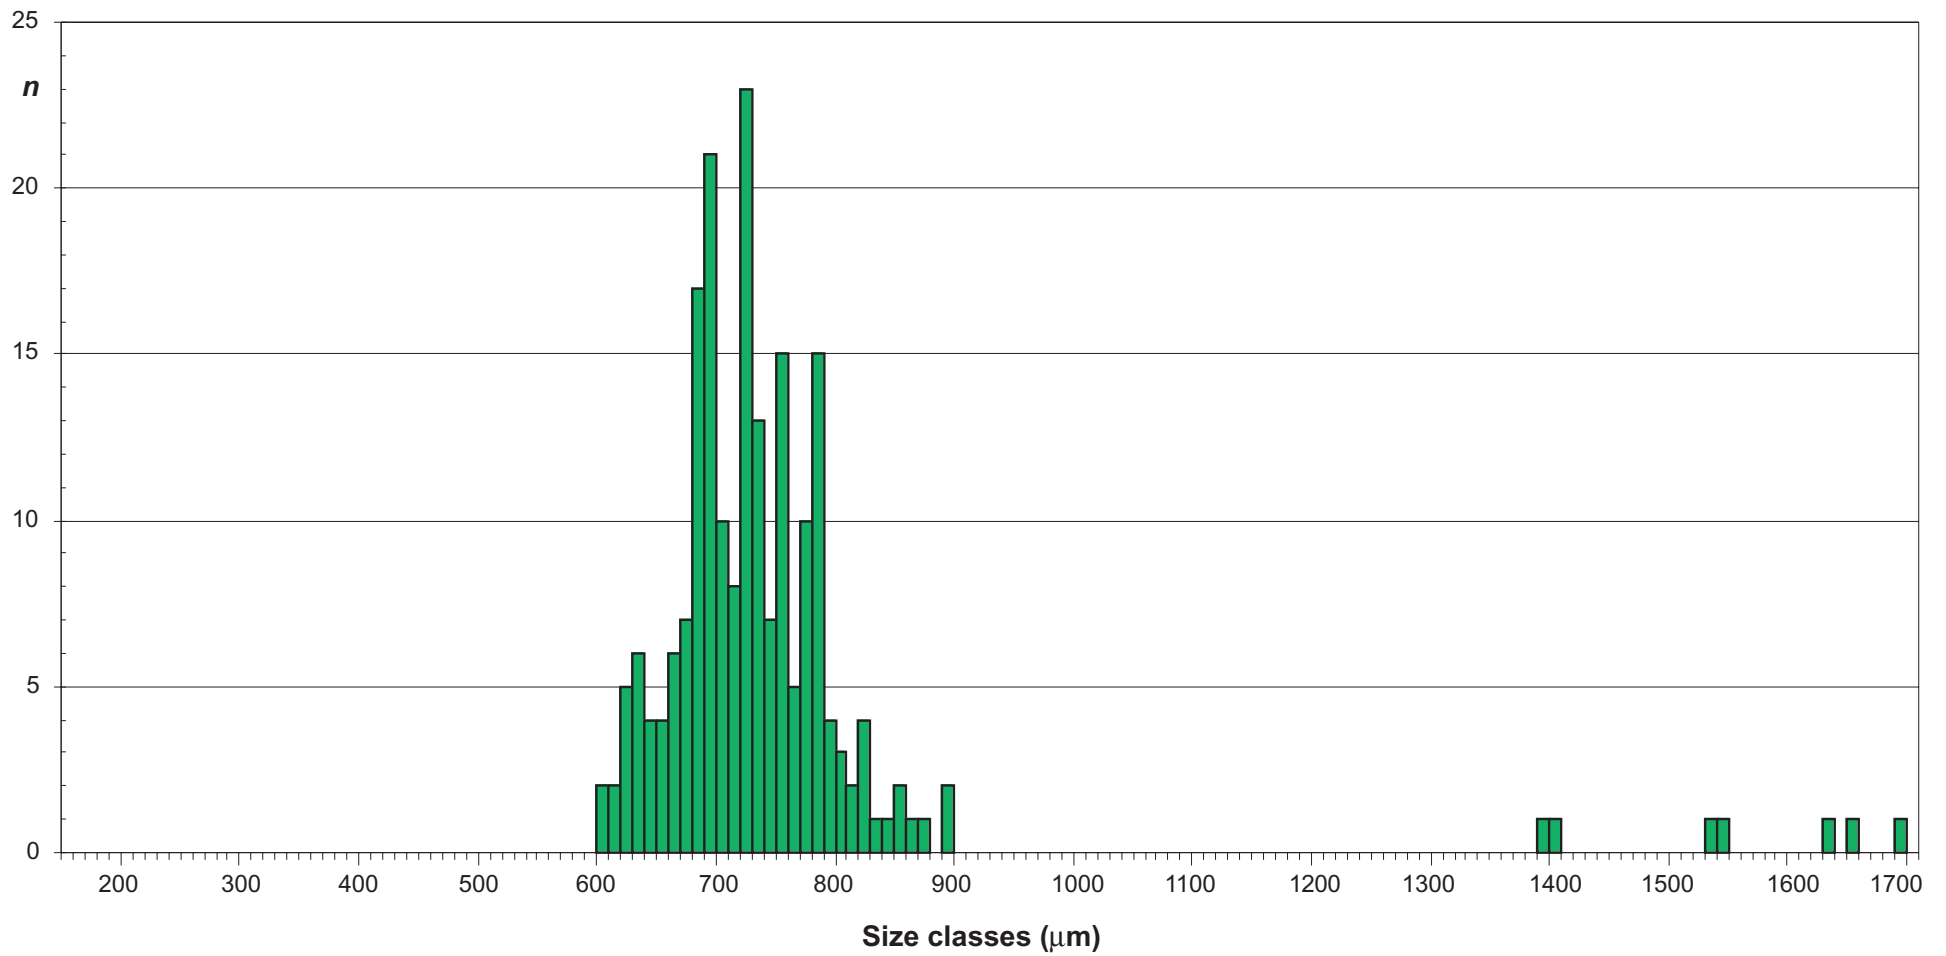

**Figure DR5. Size histogram of *Pseudoides*-type embryos with germ band formation, n=206**

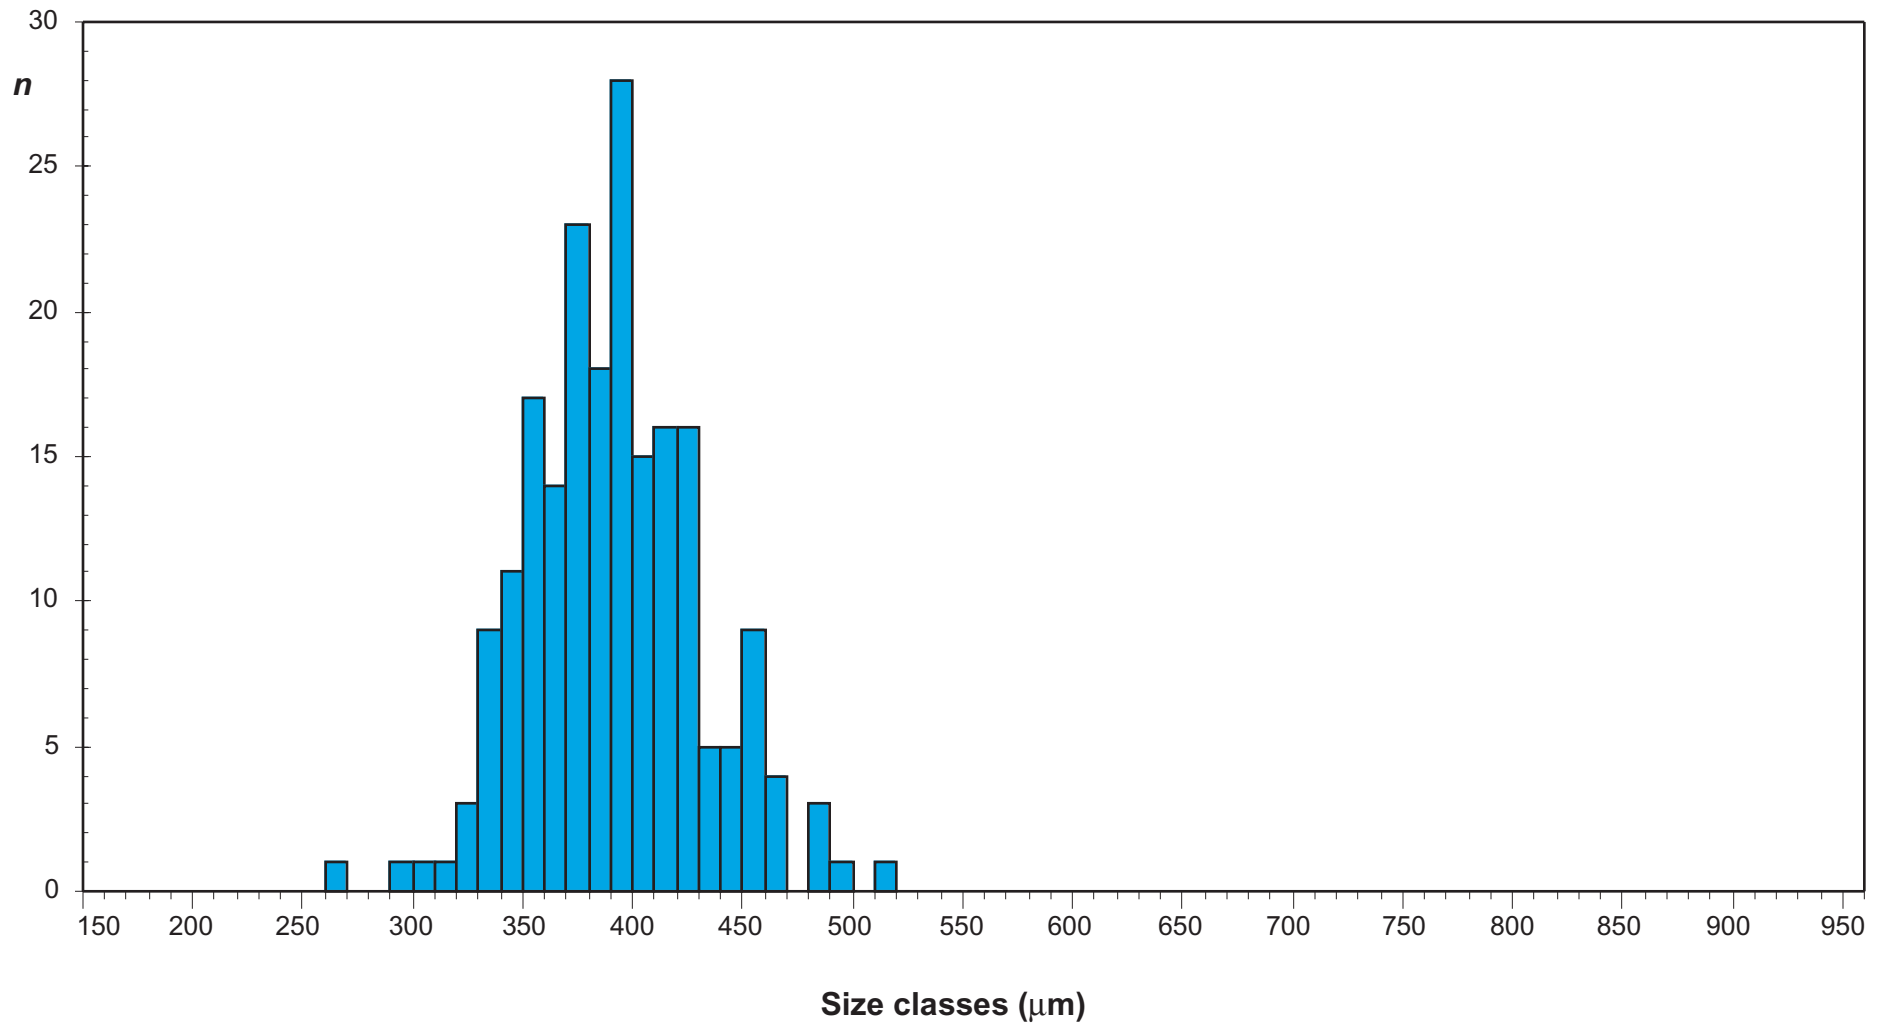

Supplement: Supplementary file 1 [file 22745852]
